# Supplementary material for: Prognostic Value of Deep Learning-Mediated Treatment Monitoring in Lung Cancer Patients Receiving Immunotherapy
Source: PubMed Central journal article supplement (PMC7962549; doi:10.3389/fonc.2021.609054), 2021-03-02
Supplement: DataSheet_1.pdf [file DataSheet_1.pdf]

## S1. Generation of Heatmaps for Model Explainability

### *Input (prior, subsequent, time\_interval, time\_start)*

---

- 1     **Reference score** → survival score on the original images
  - 2     **ROI** → cube of 64x64x64 in the top left back corner
  - 3     **Occluded images** → set intensities within the **ROI** to zero in both prior and subsequent scan
  - 4     **Occluded score** → Compute the survival score on the occluded\_images
  - 5     **ROI importance** →  $| \text{occluded\_score} - \text{reference\_score} |$
  - 6     **Prognostic map[ROI]** →  $\text{maximum}(\text{prognostic\_map}[\text{ROI}], \text{roi\_importance})$  [A]
  - 7     Move the **ROI** 8 voxels along one of the axis
  - 8     If **ROI** has not scrolled through the whole image yet, go to **Step 3**
  - 9     **Deformation map** → anatomical changes between prior and subsequent, as returned by the registration
  - 10    **Return**  $\text{gaussian\_filter}(\text{deformation\_map} \times \text{prognostic\_map})$  [B]
- 

*[A] Since the ROI are overlapping, we chose to use the maximum function, which prevents erroneous overriding of previous estimation. [B] We fuse the prognostic map and the deformation map together (S3-4.0) to refine the hotspots to regions of changes, and therefore help along the radiologist in the visual interpretation.*
