# Supplementary material for: Prognostic Value of Deep Learning-Mediated Treatment Monitoring in Lung Cancer Patients Receiving Immunotherapy
Source: PubMed Central journal article supplement (PMC7962549; doi:10.3389/fonc.2021.609054), 2021-03-02

***S2. Illustration of the 3 worst case of image registration performance***

Prior Scan

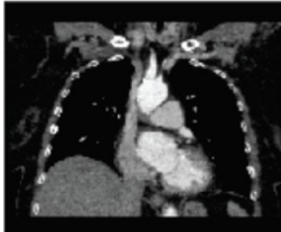

Affine Warp

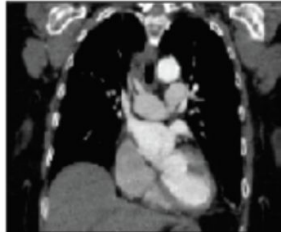

Deformable Warp

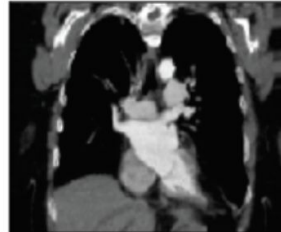

Subsequent Scan

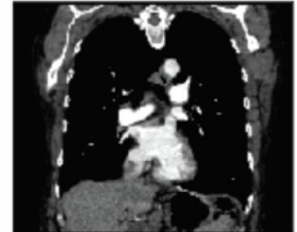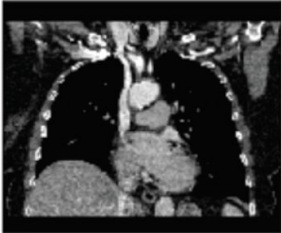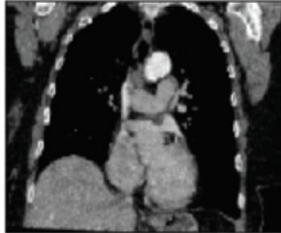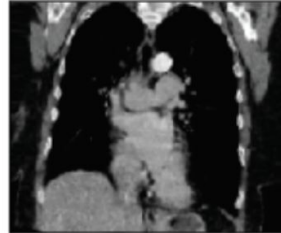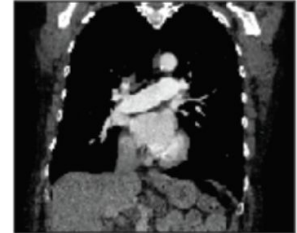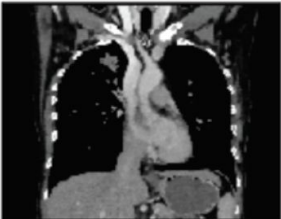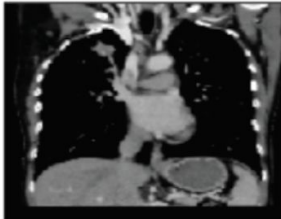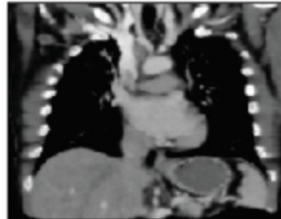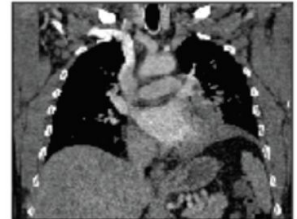

Supplement: DataSheet_2.pdf [file DataSheet_2.pdf]
